# Supplementary material
Source: PubMed Central journal article supplement (PMC11468605)
Supplement: ADHM-12-2301163-s001.pdf [file ADHM-12-2301163-s001.pdf]

# ADVANCED HEALTHCARE MATERIALS

## Supporting Information

for *Adv. Healthcare Mater.*, DOI 10.1002/adhm.202301163

Programming Cell-Derived Vesicles with Enhanced Immunomodulatory Properties

*Khaga R. Neupane, Geraldine S. Ramon, Brock Harvey, Byeong Chun, Surya P. Aryal, Abdullah A. Masud, J. Robert McCorkle, Jill M. Kolesar, Peter M. Kekenos-Huskey and Christopher I. Richards\**

Supplementary Information

# Programming Cell-Derived Vesicles for Enhanced Immunomodulatory Properties.

*Khaga R. Neupane*<sup>†</sup>, *Geraldine San Ramon*<sup>¶</sup>, *Byeong Chun*<sup>¶</sup>, *Brock Harvey*<sup>†</sup>, *Surya P. Aryal*<sup>†</sup>,  
*Abdullah A. Masud*<sup>‡</sup>, *Peter M. Kekenos-Huskey*<sup>¶</sup>, *Jill M. Kolesar*<sup>‡</sup>, and *Christopher I. Richards*<sup>†\*</sup>

<sup>†</sup>. Department of Chemistry, University of Kentucky, Lexington, KY 40506

<sup>‡</sup>. Department of Pharmacy Practice and Science, College of Pharmacy, University of Kentucky,  
Lexington, Kentucky, 40508

<sup>¶</sup>. Department of Cell and Molecular Physiology, Loyola University Chicago, Chicago, IL, United  
States

| Gene Symbol    | LogFC | Gene Symbol  | LogFC |
|----------------|-------|--------------|-------|
| TNF            | 2.05  | CD36         | -5.22 |
| IL6            | 4.77  | ADORA3       | -5.51 |
| CXCL1 (KC/GRO) | 6.14  | TGFBR2       | -3.77 |
| IL1B           | 6     | PRKCA        | -3.76 |
| IFNG           | 4.25  | CSF1R        | -3.04 |
| CCL5           | 5.85  | CD9          | -2.9  |
| CD54 (ICAM1)   | 4.95  | TLR5         | -4.86 |
| TLR2           | 2.41  | IL1R1        | -3.91 |
| TNFSF13B       | 2.04  | CD206 (MRC1) | -4.06 |
| CD63 (LAMP3)   | 6.41  | GPR34        | -5.73 |
| CD40           | 1.67  | FFAR4        | -2.19 |
| CD95 (FAS)     | 4.76  | GNAQ         | -2.55 |
| CXCL9          | 7.63  | CD180        | -5.15 |
| CCL1           | 3.52  | ALOX15       | -4.19 |
| CXCL2 (MIP-2)  | 3.23  | CCL26        | -5.21 |

**SI Table 1.** Differentially expressed genes in M1 macrophage. The logFC was calculated by  $\log(M1) - \log(M2)$ . In this case, positive logFC indicate upregulation of genes such as TNF, IL6 and IL1B in M1 and downregulation of genes CD36, ADORA3 and TGFBR2 in M1

| Receptor | Score | Signaling pathway                                                                            | Ligand           |
|----------|-------|----------------------------------------------------------------------------------------------|------------------|
| TLR2     | 5.75  | 'TLR2', 'RAC1', 'PI3K', 'PDPK1', 'AKT', 'NFKB1', 'IL1B', 'M1 polarization'                   | PAMPs            |
| CCR3     | 6     | 'CCR3', 'GNAI1', 'PI3K', 'PDPK1', 'AKT', 'NFKB1', 'IL1B', 'M1 polarization'                  | CCL5             |
| TLR4     | 6     | 'TLR4', 'TICAM2', 'TICAM1', 'TBK1', 'IKBKE', 'IRF3', 'M1 polarization'                       | PAMPs            |
| CCR1     | 6     | 'CCR1', 'GNAI1', 'PI3K', 'PDPK1', 'AKT', 'NFKB1', 'IL1B', 'M1 polarization'                  | CCL3, CCL5       |
| CCR5     | 6     | 'CCR5', 'GNAI1', 'PI3K', 'PDPK1', 'AKT', 'NFKB1', 'IL1B', 'M1 polarization'                  | CCL3, CCL4, CCL5 |
| TLR1     | 6     | 'TLR1', 'RAC1', 'PI3K', 'PDPK1', 'AKT', 'NFKB1', 'IL1B', 'M1 polarization'                   | PAMPs            |
| TNFRSF1B | 7     | 'TNFRSF1B', 'TRAF2', 'RIPK1', 'MAP3K1', 'MAP2K7', 'MAPK8', 'IRF3', 'M1 polarization'         | TNF- $\alpha$    |
| ITGAL    | 7     | 'ITGAL', 'PTK2B', 'RAC1', 'PI3K', 'PDPK1', 'AKT', 'NFKB1', 'IL1B', 'M1 polarization'         | ICAM1            |
| ITGB2    | 7     | 'ITGB2', 'PTK2B', 'RAC1', 'PI3K', 'PDPK1', 'AKT', 'NFKB1', 'IL1B', 'M1 polarization'         | ICAM1            |
| TNFRSF1A | 7.5   | 'TNFRSF1A', 'TRADD', 'FADD', 'RIPK1', 'MAP3K1', 'MAP2K7', 'MAPK8', 'IRF3', 'M1 polarization' | TNF- $\alpha$    |

**SI Table 2.** M1 polarization pathways and their associated membrane receptors identified by the approach outlined in figure S8. Pathways are shown in figure 8 for clarity.

| Serial No. | Macrophage-Engineered Vesicles | Zeta Potential (mV) |
|------------|--------------------------------|---------------------|
| 1          | MEVs                           | -5.2                |
| 2          | P(TNF)-MEVs                    | -9.2                |
| 3          | P(CD54)-MEVs                   | -5.5                |
| 4          | pam-MEVs                       | -16.8               |
| 5          | cpg-MEVs                       | -9.3                |

**SI Table 3.** Zeta potential values measured for various programmed vesicles. Negative zeta potential values of these programmed vesicles indicate improved stability in aqueous solution.

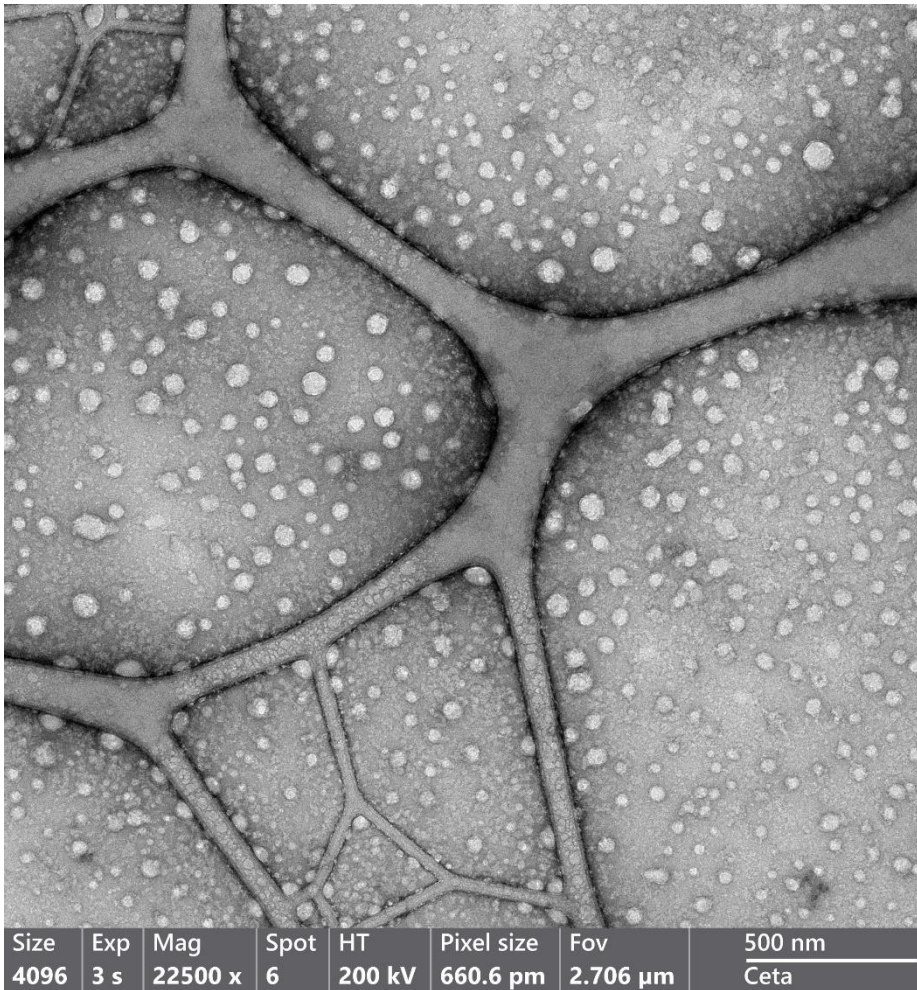

**Figure S1.** Transmission electron microscopy micrograph of negatively stained Raw 264.7-derived vesicles. Vesicles were measured to have a diameter ranging from 25-150 nm, with an average diameter of  $70 \pm 20$  nm. Vesicles were observed to primarily possess a relatively spherical or oblong morphology. Deformation of the vesicles may be the result of sample preparation for TEM.

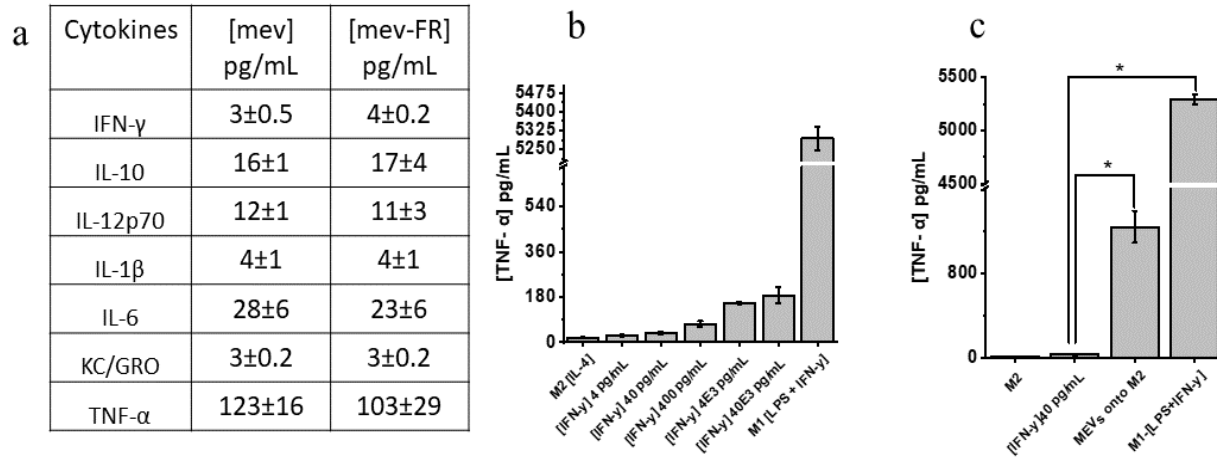

**Figure S2.** Cytokine content of MEVs (a) Quantification of pro-inflammatory cytokine present on MEVs. MEV were freeze-ruptured (MEV-FR) in liquid nitrogen to assess cytokines present inside of the MEVs. (b) A dose response study showing the pro-inflammatory cytokine-TNF- $\alpha$  released by M2 macrophages after incubation with different concentration of IFN- $\gamma$  for 24 hours. (c) Quantification of pro-inflammatory cytokine-TNF- $\alpha$  released by M2 macrophages after incubation with 40pg/mL IFN- $\gamma$  which is representative of the cytokine present on  $1 \times 10^{11}$  MEVs,  $1 \times 10^{11}$  MEVs and M1 polarizing stimulants (LPS (20 ng/mL) + IFN- $\gamma$  (20 ng/mL)) for 24 hours. Supernatants were assayed in triplicate using a mouse TNF- $\alpha$  V-PLEX cytokine assay kit from Meso Scale Discovery.

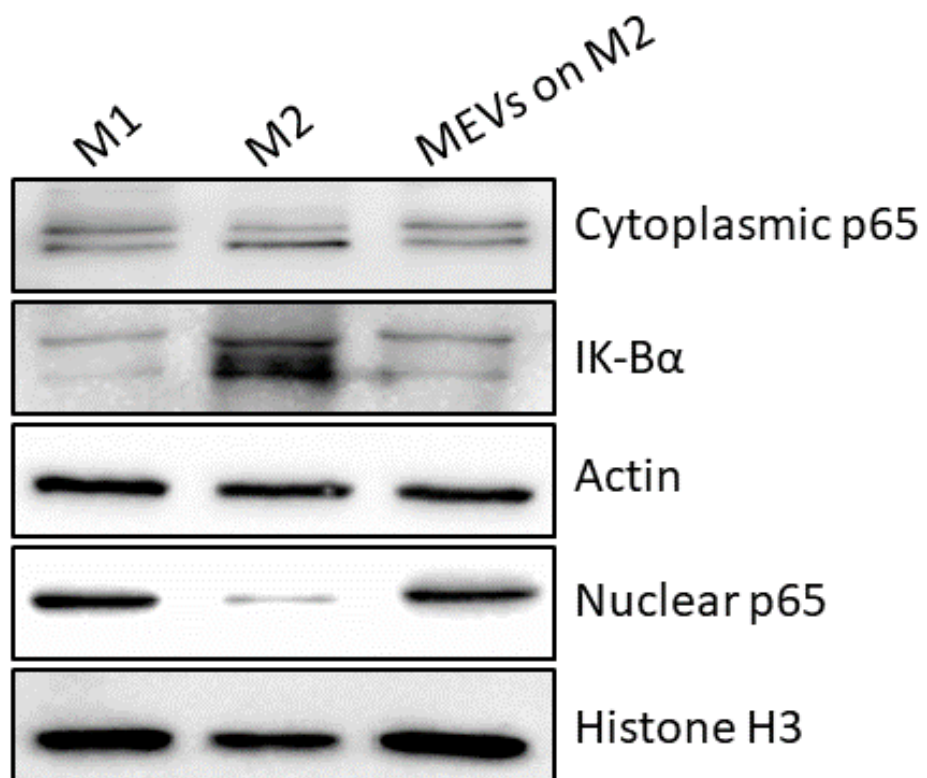

**Figure S3.** Western blot analysis of M1 and M2 macrophages compared to MEV treated M2 macrophages for p65 translocation.

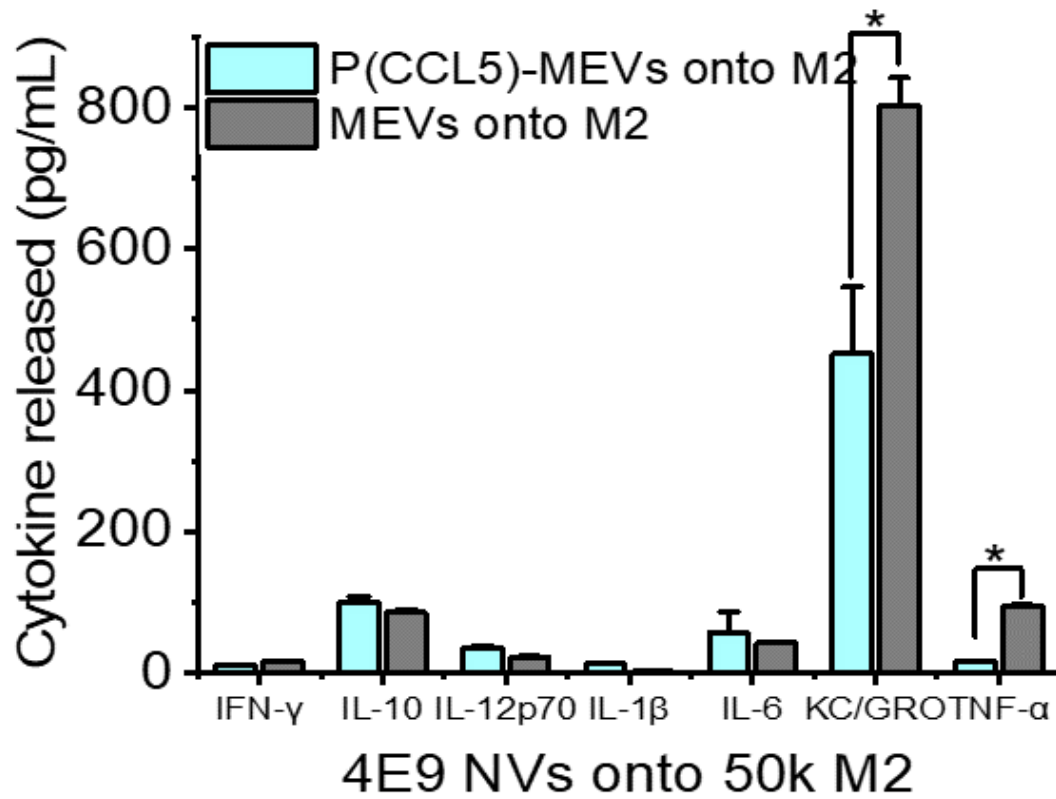

**Figure S4.** CCL5-programmed MEVs treated M2 BMDMs produce higher TNF- $\alpha$  compared M2 BMDMs incubated with regular MEVs.



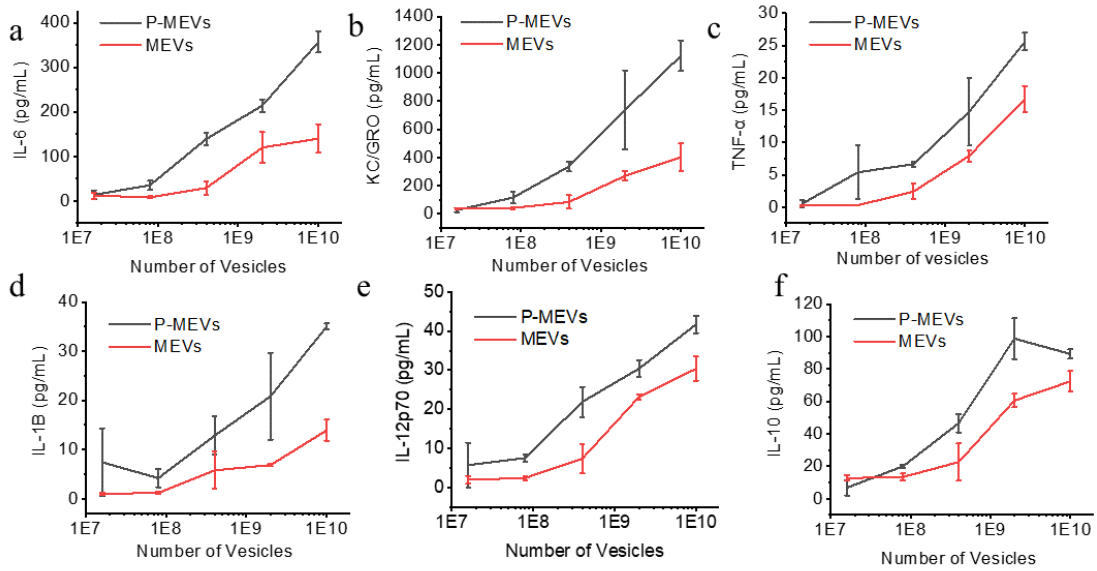

**Figure S5.** Dose response studies for the cytokine released by M2 macrophages that had been incubated with an increasing concentration of MEVs or CD54-programmed MEVs.

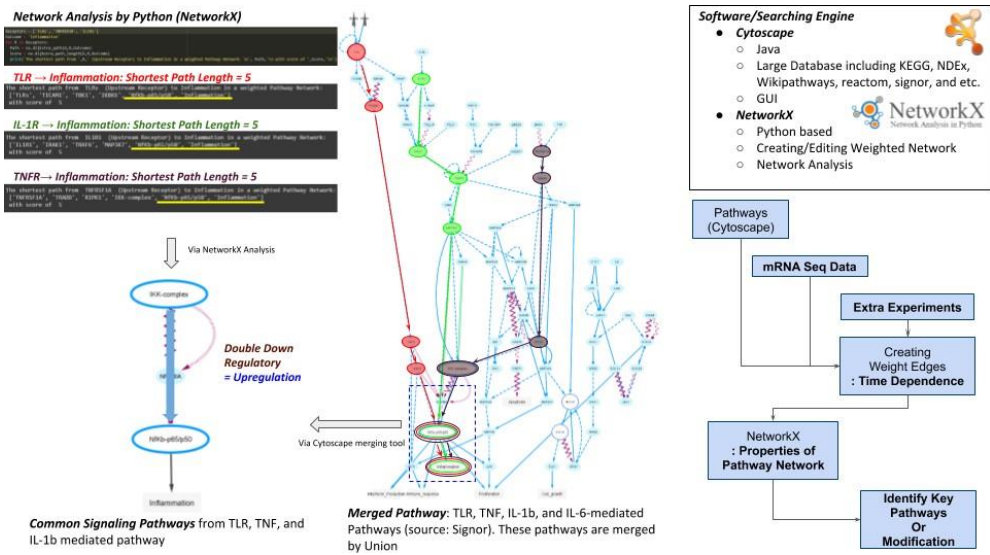

**Figure S6.** Summary of Cytoscape/NetworkX based network analysis.

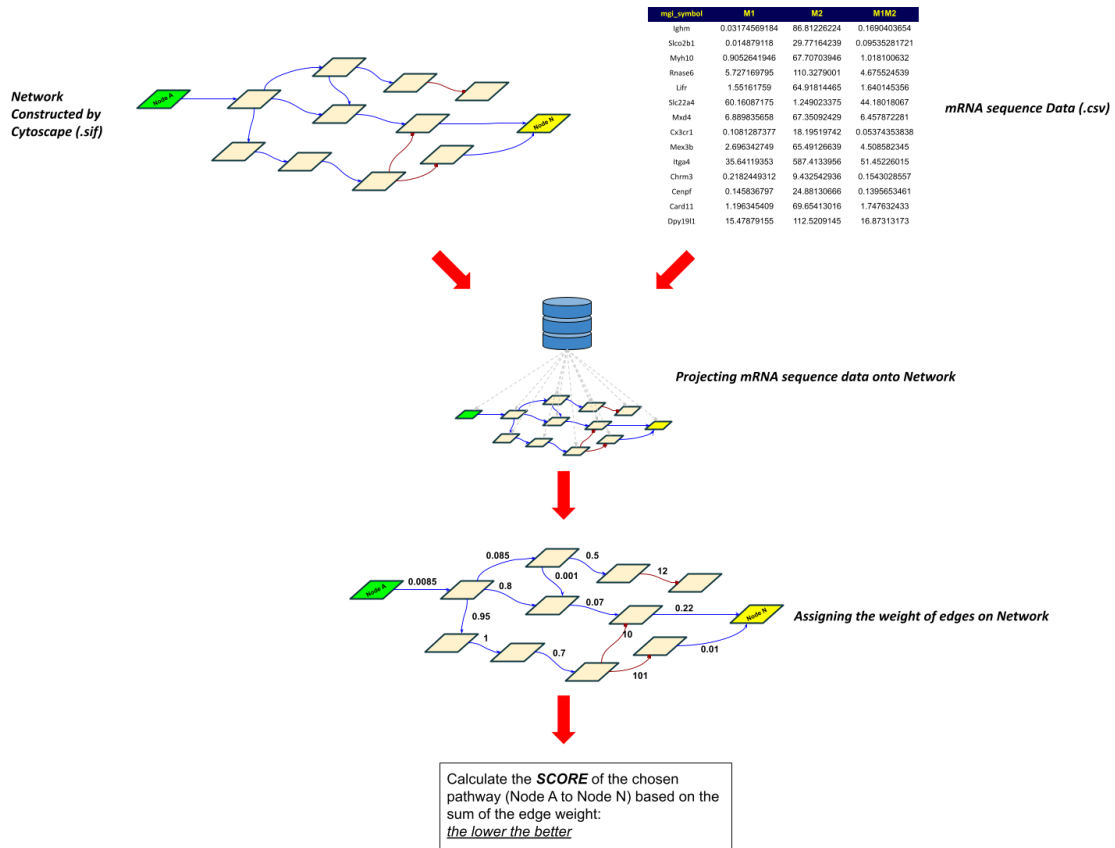

**Figure S7.** Demonstrating how mRNA sequence data is incorporated with the network constructed via Cytoscape.
